# Supplementary material for: Probing ligand conformation and net dimensionality in a series of tetraphenylethene-based metal–organic frameworks
Source: Frontiers journal article supplement (doi:10.3389/fchem.2024.1396123), 2024-04-25

---

The following ALERTS were generated. Each ALERT has the format

**test-name\_ALERT\_alert-type\_alert-level.**

Click on the hyperlinks for more details of the test.

---

### Alert level A

THETM01\_ALERT\_3\_A The value of  $\sin(\theta_{\max})/\lambda$  is less than 0.550

Calculated  $\sin(\theta_{\max})/\lambda = 0.4009$

MOF materials are usually diffract weakly at higher angles.

---

### Alert level B

|                   |                                                  |         |           |
|-------------------|--------------------------------------------------|---------|-----------|
| PLAT088_ALERT_3_B | Poor Data / Parameter Ratio .....                | 7.07    | Note      |
| PLAT094_ALERT_2_B | Ratio of Maximum / Minimum Residual Density .... | 4.14    | Report    |
| PLAT242_ALERT_2_B | Low 'MainMol' Ueq as Compared to Neighbors of    |         | Cu1 Check |
| PLAT341_ALERT_3_B | Low Bond Precision on C-C Bonds .....            | 0.02187 | Ang.      |

---

### Alert level C

|                   |                                                  |      |     |        |              |
|-------------------|--------------------------------------------------|------|-----|--------|--------------|
| PLAT234_ALERT_4_C | Large Hirshfeld Difference Cu1                   | --O1 | .   | 0.21   | Ang.         |
| PLAT234_ALERT_4_C | Large Hirshfeld Difference O2                    | --C1 | .   | 0.24   | Ang.         |
| PLAT234_ALERT_4_C | Large Hirshfeld Difference C6                    | --C8 | .   | 0.18   | Ang.         |
| PLAT241_ALERT_2_C | High 'MainMol' Ueq as Compared to Neighbors of   |      | O2  |        | Check        |
| PLAT241_ALERT_2_C | High 'MainMol' Ueq as Compared to Neighbors of   |      | O3  |        | Check        |
| PLAT250_ALERT_2_C | Large U3/U1 Ratio for Average U(i,j) Tensor .... |      |     | 2.5    | Note         |
| PLAT260_ALERT_2_C | Large Average Ueq of Residue Including           |      | Cu1 | 0.122  | Check        |
| PLAT334_ALERT_2_C | Small <C-C> Benzene Dist. C2                     | -C7  | .   | 1.37   | Ang.         |
| PLAT767_ALERT_4_C | INS Embedded LIST 6 Instruction Should be LIST 4 |      |     |        | Please Check |
| PLAT906_ALERT_3_C | Large K Value in the Analysis of Variance .....  |      |     | 2.127  | Check        |
| PLAT910_ALERT_3_C | Missing # of FCF Reflection(s) Below Theta(Min). |      |     | 6      | Note         |
| PLAT918_ALERT_3_C | Reflection(s) with I(obs) much Smaller I(calc) . |      |     | 4      | Check        |
| PLAT922_ALERT_1_C | wR2 in the CIF and FCF Differ by .....           |      |     | 0.0025 | Check        |
| PLAT923_ALERT_1_C | S Values in the CIF and FCF Differ by .....      |      |     | 0.013  | Check        |

---

### Alert level G

|                   |                                                  |  |  |       |        |
|-------------------|--------------------------------------------------|--|--|-------|--------|
| PLAT003_ALERT_2_G | Number of Uiso or Uij Restrained non-H Atoms ... |  |  | 13    | Report |
| PLAT004_ALERT_5_G | Polymeric Structure Found with Maximum Dimension |  |  | 2     | Info   |
| PLAT066_ALERT_1_G | Predicted and Reported Tmin&Tmax Range Identical |  |  | ?     | Check  |
| PLAT072_ALERT_2_G | SHELXL First Parameter in WGHT Unusually Large   |  |  | 0.14  | Report |
| PLAT083_ALERT_2_G | SHELXL Second Parameter in WGHT Unusually Large  |  |  | 32.27 | Why ?  |
| PLAT187_ALERT_4_G | The CIF-Embedded .res File Contains RIGU Records |  |  | 2     | Report |
| PLAT199_ALERT_1_G | Reported _cell_measurement_temperature ..... (K) |  |  | 273   | Check  |
| PLAT200_ALERT_1_G | Reported _diffrn_ambient_temperature ..... (K)   |  |  | 273   | Check  |
| PLAT606_ALERT_4_G | Solvent Accessible VOID(S) in Structure .....    |  |  | !     | Info   |
| PLAT794_ALERT_5_G | Tentative Bond Valency for Cu1 (II) .            |  |  | 2.29  | Info   |
| PLAT860_ALERT_3_G | Number of Least-Squares Restraints .....         |  |  | 81    | Note   |
| PLAT868_ALERT_4_G | ALERTS Due to the Use of _smtbx_masks Suppressed |  |  | !     | Info   |
| PLAT909_ALERT_3_G | Percentage of I>2sig(I) Data at Theta(Max) Still |  |  | 78%   | Note   |
| PLAT913_ALERT_3_G | Missing # of Very Strong Reflections in FCF .... |  |  | 3     | Note   |
| PLAT933_ALERT_2_G | Number of HKL-OMIT Records in Embedded .res File |  |  | 1     | Note   |
| PLAT978_ALERT_2_G | Number C-C Bonds with Positive Residual Density. |  |  | 0     | Info   |

---

1 **ALERT level A** = Most likely a serious problem - resolve or explain

4 **ALERT level B** = A potentially serious problem, consider carefully

14 **ALERT level C** = Check. Ensure it is not caused by an omission or oversight  
16 **ALERT level G** = General information/check it is not something unexpected

5 ALERT type 1 CIF construction/syntax error, inconsistent or missing data  
12 ALERT type 2 Indicator that the structure model may be wrong or deficient  
9 ALERT type 3 Indicator that the structure quality may be low  
7 ALERT type 4 Improvement, methodology, query or suggestion  
2 ALERT type 5 Informative message, check

---

It is advisable to attempt to resolve as many as possible of the alerts in all categories. Often the minor alerts point to easily fixed oversights, errors and omissions in your CIF or refinement strategy, so attention to these fine details can be worthwhile. In order to resolve some of the more serious problems it may be necessary to carry out additional measurements or structure refinements. However, the purpose of your study may justify the reported deviations and the more serious of these should normally be commented upon in the discussion or experimental section of a paper or in the "special\_details" fields of the CIF. checkCIF was carefully designed to identify outliers and unusual parameters, but every test has its limitations and alerts that are not important in a particular case may appear. Conversely, the absence of alerts does not guarantee there are no aspects of the results needing attention. It is up to the individual to critically assess their own results and, if necessary, seek expert advice.

### **Publication of your CIF in IUCr journals**

A basic structural check has been run on your CIF. These basic checks will be run on all CIFs submitted for publication in IUCr journals (*Acta Crystallographica*, *Journal of Applied Crystallography*, *Journal of Synchrotron Radiation*); however, if you intend to submit to *Acta Crystallographica Section C* or *E* or *IUCrData*, you should make sure that full publication checks are run on the final version of your CIF prior to submission.

### **Publication of your CIF in other journals**

Please refer to the *Notes for Authors* of the relevant journal for any special instructions relating to CIF submission.

---

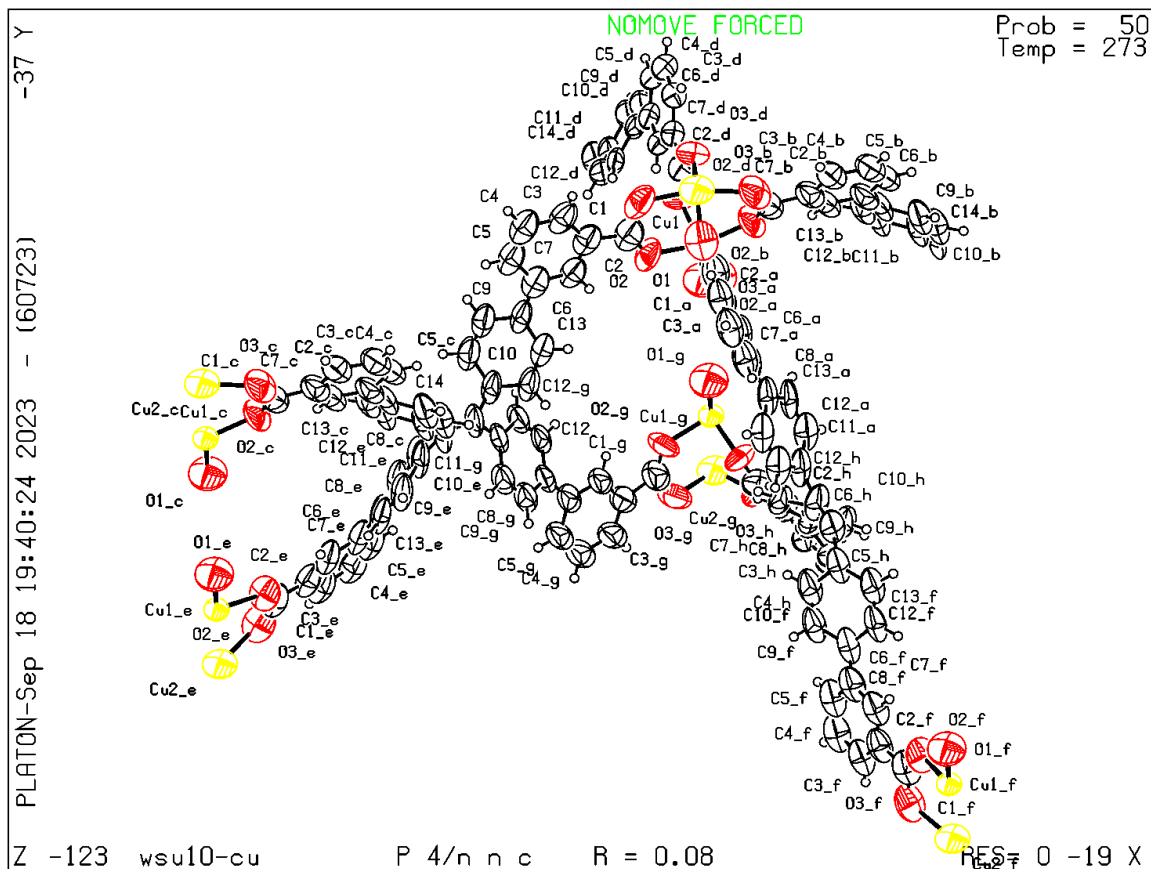

Supplement: Data_Sheet_1.PDF [file Data_Sheet_1.PDF]
