# Supplementary material for: Probing ligand conformation and net dimensionality in a series of tetraphenylethene-based metal–organic frameworks
Source: Frontiers journal article supplement (doi:10.3389/fchem.2024.1396123), 2024-04-25

## checkCIF/PLATON report

Structure factors have been supplied for datablock(s) 10cu\_0m

THIS REPORT IS FOR GUIDANCE ONLY. IF USED AS PART OF A REVIEW PROCEDURE FOR PUBLICATION, IT SHOULD NOT REPLACE THE EXPERTISE OF AN EXPERIENCED CRYSTALLOGRAPHIC REFEREE.

No syntax errors found.      CIF dictionary      Interpreting this report

### Datablock: 10cu\_0m

---

|                        |                                                  |                    |
|------------------------|--------------------------------------------------|--------------------|
| Bond precision:        | C-C = 0.0079 Å                                   | Wavelength=0.71073 |
| Cell:                  | a=27.190 (5)      b=29.265 (6)      c=20.527 (4) |                    |
|                        | alpha=90      beta=112.081 (8)      gamma=90     |                    |
| Temperature:           | 150 K                                            |                    |
|                        | Calculated                                       | Reported           |
| Volume                 | 15136 (5)                                        | 15136 (5)          |
| Space group            | C 2/c                                            | C 1 2/c 1          |
| Hall group             | -C 2yc                                           | -C 2yc             |
| Moiety formula         | C62 H50 Cu2 N2 O10 [+<br>solvent]                | C62 H50 Cu2 N2 O10 |
| Sum formula            | C62 H50 Cu2 N2 O10 [+<br>solvent]                | C62 H50 Cu2 N2 O10 |
| Mr                     | 1110.14                                          | 1110.12            |
| Dx, g cm <sup>-3</sup> | 0.974                                            | 0.974              |
| Z                      | 8                                                | 8                  |
| Mu (mm <sup>-1</sup> ) | 0.606                                            | 0.606              |
| F000                   | 4592.0                                           | 4592.0             |
| F000'                  | 4598.98                                          |                    |
| h, k, lmax             | 32, 34, 24                                       | 32, 34, 24         |
| Nref                   | 13003                                            | 12917              |
| Tmin, Tmax             | 0.702, 0.941                                     | 0.627, 0.745       |
| Tmin'                  | 0.648                                            |                    |

Correction method= # Reported T Limits: Tmin=0.627 Tmax=0.745

AbsCorr = MULTI-SCAN

Data completeness= 0.993

Theta(max)= 24.778

R(reflections)= 0.0751( 9234)

wR2(reflections)=  
0.2492( 12917)

S = 1.049

Npar= 598

The following ALERTS were generated. Each ALERT has the format

**test-name\_ALERT\_alert-type\_alert-level.**

Click on the hyperlinks for more details of the test.

### Alert level B

PLAT934\_ALERT\_3\_B Number of (Iobs-Icalc)/Sigma(W) > 10 Outliers .. 2 Check

### Alert level C

THETM01\_ALERT\_3\_C The value of sine(theta\_max)/wavelength is less than 0.590

Calculated sin(theta\_max)/wavelength = 0.5897

PLAT218\_ALERT\_3\_C Constrained U(ij) Components(s) for N1S . 6 Check  
PLAT218\_ALERT\_3\_C Constrained U(ij) Components(s) for C1S . 6 Check  
PLAT218\_ALERT\_3\_C Constrained U(ij) Components(s) for C2S . 6 Check  
PLAT218\_ALERT\_3\_C Constrained U(ij) Components(s) for C3S . 6 Check  
PLAT218\_ALERT\_3\_C Constrained U(ij) Components(s) for C4S . 6 Check  
PLAT220\_ALERT\_2\_C NonSolvent Resd 1 C Ueq(max)/Ueq(min) Range 3.6 Ratio  
PLAT222\_ALERT\_3\_C NonSolvent Resd 1 H Uiso(max)/Uiso(min) Range 4.3 Ratio  
PLAT241\_ALERT\_2\_C High 'MainMol' Ueq as Compared to Neighbors of O2S Check  
PLAT242\_ALERT\_2\_C Low 'MainMol' Ueq as Compared to Neighbors of Cu1 Check  
PLAT242\_ALERT\_2\_C Low 'MainMol' Ueq as Compared to Neighbors of Cu2 Check  
PLAT242\_ALERT\_2\_C Low 'MainMol' Ueq as Compared to Neighbors of N1S Check  
PLAT341\_ALERT\_3\_C Low Bond Precision on C-C Bonds ..... 0.00789 Ang.  
PLAT412\_ALERT\_2\_C Short Intra XH3 .. XHn H2SA ..H4SB . 1.81 Ang.  
x,y,z = 1\_555 Check  
PLAT741\_ALERT\_1\_C Bond Calc 1.2453(3), Rep 1.24550 ..... Missing s.u.  
N1S -C1S 1\_555 1\_555 ..... # 29 Check  
PLAT741\_ALERT\_1\_C Bond Calc 1.5038(3), Rep 1.50460 ..... Missing s.u.  
N1S -C3S 1\_555 1\_555 ..... # 30 Check  
PLAT741\_ALERT\_1\_C Bond Calc 1.4429(3), Rep 1.44520 ..... Missing s.u.  
N1S -C4S 1\_555 1\_555 ..... # 31 Check  
PLAT741\_ALERT\_1\_C Bond Calc 1.5258(3), Rep 1.52510 ..... Missing s.u.  
C1S -C2S 1\_555 1\_555 ..... # 37 Check  
PLAT742\_ALERT\_1\_C Angle Calc 115.26(1), Rep 115.40 ..... Missing s.u.  
C1S -N1S -C3S 1\_555 1\_555 1\_555 # 41 Check  
PLAT742\_ALERT\_1\_C Angle Calc 127.55(1), Rep 127.50 ..... Missing s.u.  
C1S -N1S -C4S 1\_555 1\_555 1\_555 # 42 Check  
PLAT742\_ALERT\_1\_C Angle Calc 115.02(1), Rep 115.00 ..... Missing s.u.  
C4S -N1S -C3S 1\_555 1\_555 1\_555 # 43 Check  
PLAT742\_ALERT\_1\_C Angle Calc 110.64(1), Rep 110.60 ..... Missing s.u.  
N1S -C1S -C2S 1\_555 1\_555 1\_555 # 54 Check  
PLAT743\_ALERT\_1\_C Torsion Calc -179.72(1), Rep -179.70 ..... Missing s.u.  
C3S -N1S -C1S -C2S 1\_555 1\_555 1\_555 1\_555 # 32 Check  
PLAT743\_ALERT\_1\_C Torsion Calc -17.43(1), Rep -17.40 ..... Missing s.u.  
C4S -N1S -C1S -C2S 1\_555 1\_555 1\_555 1\_555 # 36 Check  
PLAT767\_ALERT\_4\_C INS Embedded LIST 6 Instruction Should be LIST 4 Please Check  
PLAT905\_ALERT\_3\_C Negative K value in the Analysis of Variance ... -0.748 Report  
PLAT910\_ALERT\_3\_C Missing # of FCF Reflection(s) Below Theta(Min). 8 Note  
PLAT911\_ALERT\_3\_C Missing FCF Refl Between Thmin & STh/L= 0.590 75 Report  
PLAT971\_ALERT\_2\_C Check Calcd Resid. Dens. 1.08Ang From C3S 1.86 eA-3

|                   |                                           |            |
|-------------------|-------------------------------------------|------------|
| PLAT972_ALERT_2_C | Check Calcd Resid. Dens. 0.23Ang From C4S | -1.60 eA-3 |
| PLAT977_ALERT_2_C | Check Negative Difference Density on H4SC | -0.40 eA-3 |

---

### ● Alert level G

|                   |                                                  |       |        |
|-------------------|--------------------------------------------------|-------|--------|
| PLAT004_ALERT_5_G | Polymeric Structure Found with Maximum Dimension | 3     | Info   |
| PLAT063_ALERT_4_G | Crystal Size Possibly too Large for Beam Size .. | 0.70  | mm     |
| PLAT072_ALERT_2_G | SHELXL First Parameter in WGHT Unusually Large   | 0.15  | Report |
| PLAT083_ALERT_2_G | SHELXL Second Parameter in WGHT Unusually Large  | 37.77 | Why ?  |
| PLAT169_ALERT_4_G | The CIF-Embedded .res File Contains AFIX 1 Recds | 29    | Report |
| PLAT171_ALERT_4_G | The CIF-Embedded .res File Contains EADP Records | 3     | Report |
| PLAT300_ALERT_4_G | Atom Site Occupancy of C6SA Constrained at       | 0.5   | Check  |
| PLAT300_ALERT_4_G | Atom Site Occupancy of C6SB Constrained at       | 0.5   | Check  |
| PLAT300_ALERT_4_G | Atom Site Occupancy of C8SA Constrained at       | 0.5   | Check  |
| PLAT300_ALERT_4_G | Atom Site Occupancy of C8SB Constrained at       | 0.5   | Check  |
| PLAT300_ALERT_4_G | Atom Site Occupancy of H6SA Constrained at       | 0.5   | Check  |
| PLAT300_ALERT_4_G | Atom Site Occupancy of H6SB Constrained at       | 0.5   | Check  |
| PLAT300_ALERT_4_G | Atom Site Occupancy of H6SC Constrained at       | 0.5   | Check  |
| PLAT300_ALERT_4_G | Atom Site Occupancy of H6SD Constrained at       | 0.5   | Check  |
| PLAT300_ALERT_4_G | Atom Site Occupancy of H6SE Constrained at       | 0.5   | Check  |
| PLAT300_ALERT_4_G | Atom Site Occupancy of H6SF Constrained at       | 0.5   | Check  |
| PLAT300_ALERT_4_G | Atom Site Occupancy of H8SA Constrained at       | 0.5   | Check  |
| PLAT300_ALERT_4_G | Atom Site Occupancy of H8SB Constrained at       | 0.5   | Check  |
| PLAT300_ALERT_4_G | Atom Site Occupancy of H8SC Constrained at       | 0.5   | Check  |
| PLAT300_ALERT_4_G | Atom Site Occupancy of H8SD Constrained at       | 0.5   | Check  |
| PLAT300_ALERT_4_G | Atom Site Occupancy of H8SE Constrained at       | 0.5   | Check  |
| PLAT300_ALERT_4_G | Atom Site Occupancy of H8SF Constrained at       | 0.5   | Check  |
| PLAT301_ALERT_3_G | Main Residue Disorder .....(Resd 1 )             | 3%    | Note   |
| PLAT412_ALERT_2_G | Short Intra XH3 .. XHn H7SB ..H8SF .             | 1.97  | Ang.   |
|                   | x,y,z =                                          | 1_555 | Check  |
| PLAT606_ALERT_4_G | Solvent Accessible VOID(S) in Structure .....    | !     | Info   |
| PLAT720_ALERT_4_G | Number of Unusual/Non-Standard Labels .....      | 28    | Note   |
| PLAT794_ALERT_5_G | Tentative Bond Valency for Cu1 (II) .            | 2.16  | Info   |
| PLAT868_ALERT_4_G | ALERTS Due to the Use of _smtbx_masks Suppressed | !     | Info   |
| PLAT909_ALERT_3_G | Percentage of I>2sig(I) Data at Theta(Max) Still | 42%   | Note   |
| PLAT913_ALERT_3_G | Missing # of Very Strong Reflections in FCF .... | 1     | Note   |
| PLAT933_ALERT_2_G | Number of HKL-OMIT Records in Embedded .res File | 10    | Note   |
| PLAT953_ALERT_1_G | Reported (CIF) and Actual (FCF) Hmax Differ by . | 1     | Units  |
| PLAT978_ALERT_2_G | Number C-C Bonds with Positive Residual Density. | 0     | Info   |

- 
- 0 **ALERT level A** = Most likely a serious problem - resolve or explain  
1 **ALERT level B** = A potentially serious problem, consider carefully  
31 **ALERT level C** = Check. Ensure it is not caused by an omission or oversight  
33 **ALERT level G** = General information/check it is not something unexpected
- 11 ALERT type 1 CIF construction/syntax error, inconsistent or missing data  
14 ALERT type 2 Indicator that the structure model may be wrong or deficient  
15 ALERT type 3 Indicator that the structure quality may be low  
23 ALERT type 4 Improvement, methodology, query or suggestion  
2 ALERT type 5 Informative message, check
-

It is advisable to attempt to resolve as many as possible of the alerts in all categories. Often the minor alerts point to easily fixed oversights, errors and omissions in your CIF or refinement strategy, so attention to these fine details can be worthwhile. In order to resolve some of the more serious problems it may be necessary to carry out additional measurements or structure refinements. However, the purpose of your study may justify the reported deviations and the more serious of these should normally be commented upon in the discussion or experimental section of a paper or in the "special\_details" fields of the CIF. checkCIF was carefully designed to identify outliers and unusual parameters, but every test has its limitations and alerts that are not important in a particular case may appear. Conversely, the absence of alerts does not guarantee there are no aspects of the results needing attention. It is up to the individual to critically assess their own results and, if necessary, seek expert advice.

### **Publication of your CIF in IUCr journals**

A basic structural check has been run on your CIF. These basic checks will be run on all CIFs submitted for publication in IUCr journals (*Acta Crystallographica*, *Journal of Applied Crystallography*, *Journal of Synchrotron Radiation*); however, if you intend to submit to *Acta Crystallographica Section C* or *E* or *IUCrData*, you should make sure that full publication checks are run on the final version of your CIF prior to submission.

### **Publication of your CIF in other journals**

Please refer to the *Notes for Authors* of the relevant journal for any special instructions relating to CIF submission.

Datablock 10cu\_0m - ellipsoid plot

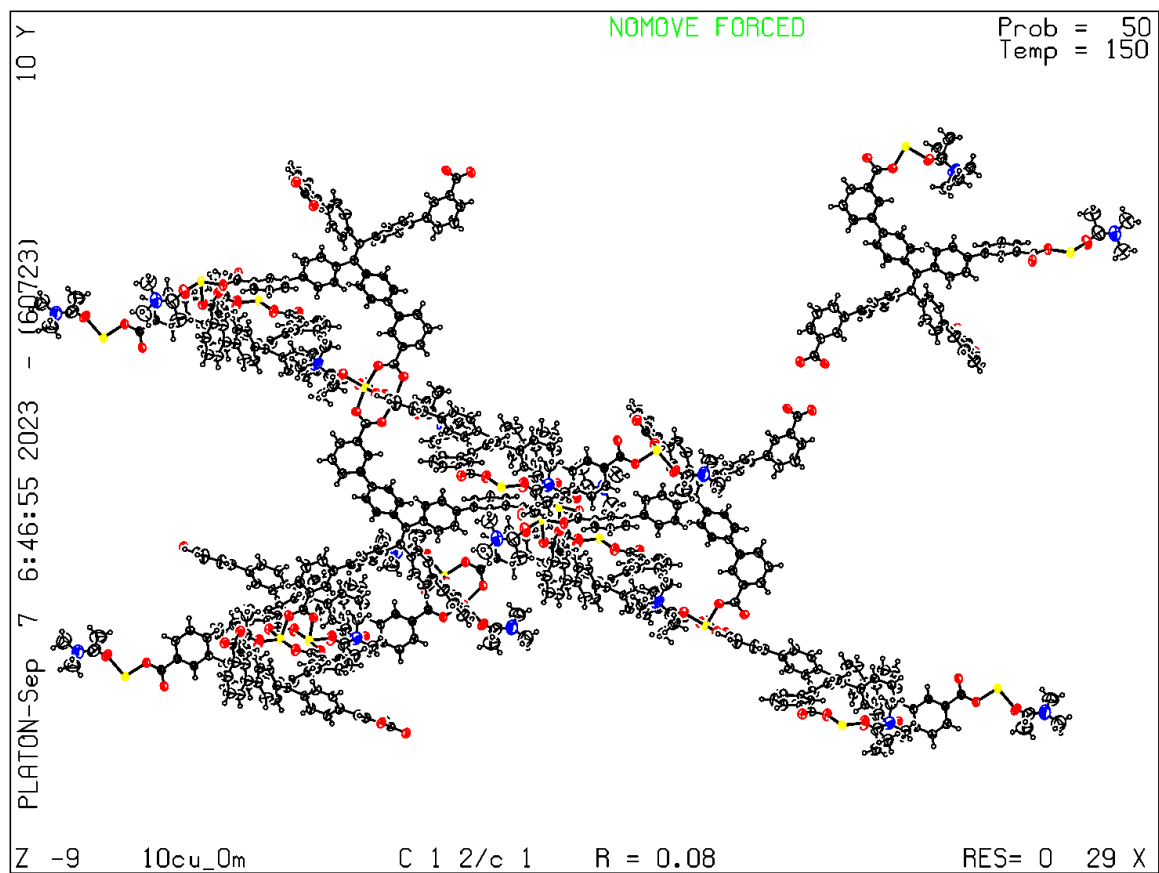

Supplement: Data_Sheet_4.PDF [file Data_Sheet_4.PDF]
